# Supplementary material for: Stepwise hydrations of anhydride tuned by hydrogen bonds: rotational study on maleic anhydride-(H2O)1–3
Source: Royal Society of Chemistry journal article supplement (doi:10.1039/d2cp05861h), 2023-01-01
Supplement: d2cp05861h1.pdf [file d2cp05861h1.pdf]

## Electronic Supplementary Information

### **Stepwise Hydrations of Anhydride Tuned by Hydrogen Bonds:**

#### **Rotational Study on Maleic Anhydride-(H<sub>2</sub>O)<sub>1-3</sub>**

Jiayi Li, Xiujuan Wang, Xinyue Zhang, Junhua Chen, Hao Wang, Xiao Tian, Xuefang Xu, and Qian Gou\*

## Contents:

**Figure S1.** Plausible isomers of the MAH-H<sub>2</sub>O complex and their relative zero-point energies inclusive of BSSE corrections optimized at the MP2/6-311++G(d,p) level within 6.5 kJ mol<sup>-1</sup>. The isomers have been labeled 1w-I, II, etc., in order of increasing energy.

**Figure S2.** Plausible isomers of the MAH-(H<sub>2</sub>O)<sub>2</sub> complex and their relative zero-point energies inclusive of BSSE corrections optimized at the MP2/6-311++G(d,p) level within 6.5 kJ mol<sup>-1</sup>. The isomers have been labeled 2w-I, II, etc., in order of increasing energy.

**Figure S3.** Plausible isomers of the MAH-(H<sub>2</sub>O)<sub>3</sub> complex and their relative zero-point energies inclusive of BSSE corrections optimized at the MP2/6-311++G(d,p) level within 6.5 kJ mol<sup>-1</sup>. The isomers have been labeled 3w-I, II, etc., in order of increasing energy.

**Figure S4.** Results of the independent gradient model based on Hirshfeld partition (IGMH) analysis of plausible isomers of the MAH-(H<sub>2</sub>O)<sub>1-3</sub> complexes.

**Figure S5.** Comparison of the hydrogen bonding structures in MAH-(H<sub>2</sub>O)<sub>1-3</sub>, formamide(FMA)-(H<sub>2</sub>O)<sub>1-3</sub> and (H<sub>2</sub>O)<sub>3-5</sub> calculated at the MP2/6-311++G(d,p) level.

**Table S1.** Spectroscopic parameters of plausible isomers of MAH-H<sub>2</sub>O calculated at the MP2/6-311++G(d,p) level of theory within 6.5 kJ mol<sup>-1</sup>.

**Table S2.** Spectroscopic parameters of plausible isomers of MAH-(H<sub>2</sub>O)<sub>2</sub> calculated at the MP2/6-311++G(d,p) level of theory within 6.5 kJ mol<sup>-1</sup>.

**Table S3.** Spectroscopic parameters of plausible isomers of MAH-(H<sub>2</sub>O)<sub>3</sub> calculated at the MP2/6-311++G(d,p) level of theory within 6.5 kJ mol<sup>-1</sup>.

**Table S4.** Experimental transition frequencies ( $\nu_{\text{obs}}$ /MHz) together with the corresponding observed – calculated differences ( $\nu_{\text{diff}}$ /MHz) for the observed isomer of MAH-H<sub>2</sub>O.

**Table S5.** Experimental transition frequencies ( $\nu_{\text{obs}}$ /MHz) together with the corresponding observed – calculated differences ( $\nu_{\text{diff}}$ /MHz) for the observed isomer of MAH-(H<sub>2</sub>O)<sub>2</sub>.

**Table S6.** Experimental transition frequencies ( $\nu_{\text{obs}}$ /MHz) together with the corresponding observed – calculated differences ( $\nu_{\text{diff}}$ /MHz) for the observed isomer of MAH-(H<sub>2</sub>O)<sub>3</sub>.

**Table S7.** Experimental transition frequencies ( $\nu_{\text{obs}}$ /MHz) together with the corresponding observed – calculated differences ( $\nu_{\text{diff}}$ /MHz) for the observed isotopologue of MAH-H<sub>2</sub><sup>18</sup>O.

**Table S8.** Experimental transition frequencies ( $\nu_{\text{obs}}$ /MHz) together with the corresponding observed – calculated differences ( $\nu_{\text{diff}}$ /MHz) for the observed isotopologue of MAH-DOH.

**Table S9.** Experimental transition frequencies ( $\nu_{\text{obs}}$ /MHz) together with the corresponding observed – calculated differences ( $\nu_{\text{diff}}$ /MHz) for the observed isotopologue of MAH-HOD.

**Table S10.** Experimental transition frequencies ( $\nu_{\text{obs}}$ /MHz) together with the corresponding observed – calculated differences ( $\nu_{\text{diff}}$ /MHz) for the observed isotopologue of MAH-DOD.

**Table S11.** Experimental transition frequencies ( $\nu_{\text{obs}}$ /MHz) together with the corresponding observed – calculated

differences ( $\nu_{\text{diff}}$ /MHz) for the observed isotopologue of MAH-H<sub>2</sub><sup>18</sup>O<sub>8</sub>-H<sub>2</sub>O.

**Table S12.** Experimental transition frequencies ( $\nu_{\text{obs}}$ /MHz) together with the corresponding observed – calculated differences ( $\nu_{\text{diff}}$ /MHz) for the observed isotopologue of MAH-H<sub>2</sub><sup>18</sup>O<sub>9</sub>-H<sub>2</sub>O.

**Table S13.** Experimental transition frequencies ( $\nu_{\text{obs}}$ /MHz) together with the corresponding observed – calculated differences ( $\nu_{\text{diff}}$ /MHz) for the observed isotopologue of MAH-H<sub>2</sub><sup>18</sup>O<sub>8</sub>-H<sub>2</sub><sup>18</sup>O<sub>9</sub>.

**Table S14.** Experimental values of spectroscopic parameters of the minor isotopologues of MAH-H<sub>2</sub>O.

**Table S15.** Experimental values of spectroscopic parameters of the minor isotopologues of MAH-(H<sub>2</sub>O)<sub>2</sub>.

**Table S16.** Comparison between  $r_s$  and  $r_e$  coordinates of the MAH-(H<sub>2</sub>O)<sub>1-2</sub> complexes.

**Table S17.** Comparison between  $r_s$  and  $r_e$  structural parameters of the MAH-(H<sub>2</sub>O)<sub>1-2</sub> complexes.

**Table S18.** MP2/6-311++G(d,p) geometry of the observed isomer of MAH-H<sub>2</sub>O.

**Table S19.** MP2/6-311++G(d,p) geometry of the observed isomer of MAH-(H<sub>2</sub>O)<sub>2</sub>.

**Table S20.** MP2/6-311++G(d,p) geometry of the observed isomer of MAH-(H<sub>2</sub>O)<sub>3</sub>.

## References

**Figure S1.** Plausible isomers of the MAH-H<sub>2</sub>O complex and their relative zero-point energies inclusive of BSSE corrections ( $\Delta E_{ZPE,BSSE}$ , in unit of kJ mol<sup>-1</sup>) optimized at the MP2/6-311++G(d,p) level<sup>[1]</sup> within 6.5 kJ mol<sup>-1</sup>. The isomers have been labeled 1w-I, II, etc., in order of increasing energy. The principal axes are also given. The absolute energy for the global minimum is  $E(1w-I)=-530.918239 E_h$ .

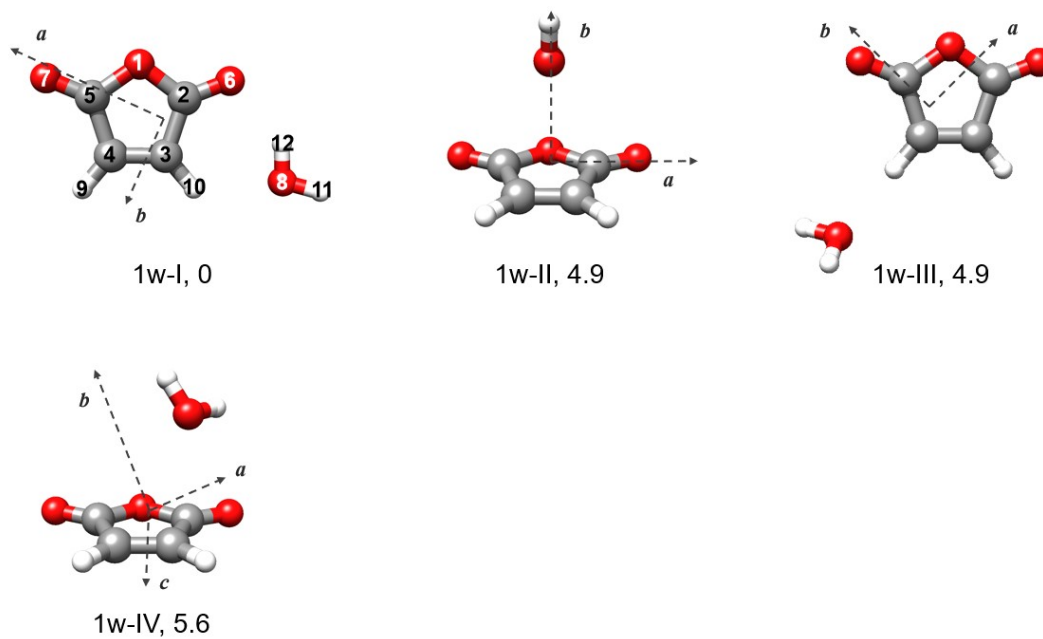

**Figure S2.** Plausible isomers of the MAH-(H<sub>2</sub>O)<sub>2</sub> complex and their relative zero-point energies inclusive of BSSE corrections ( $\Delta E_{ZPE,BSSE}$ , in unit of kJ mol<sup>-1</sup>) optimized at the MP2/6-311++G(d,p) level within 6.5 kJ mol<sup>-1</sup>. The isomers have been labeled 2w-I, II, etc., in order of increasing energy. The principal axes are also given. The absolute energy for the global minimum is  $E(2w-I)=-607.288752 E_h$ .

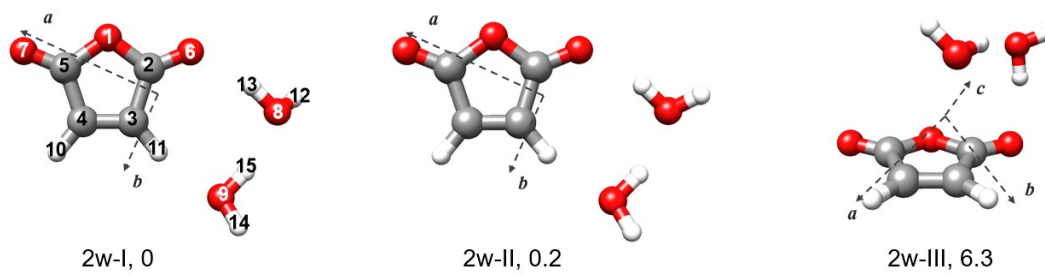

**Figure S3.** Plausible isomers of the MAH-(H<sub>2</sub>O)<sub>3</sub> complex and their relative zero-point energies inclusive of BSSE corrections ( $\Delta E_{ZPE,BSSE}$ , in unit of kJ mol<sup>-1</sup>) optimized at the MP2/6-311++G(d,p) level within 6.5 kJ mol<sup>-1</sup>. The isomers have been labeled 3w-I, II, etc., in order of increasing energy. The principal axes are also given. The absolute energy for the global minimum is  $E(3w-I)=-683.579757 E_h$ .

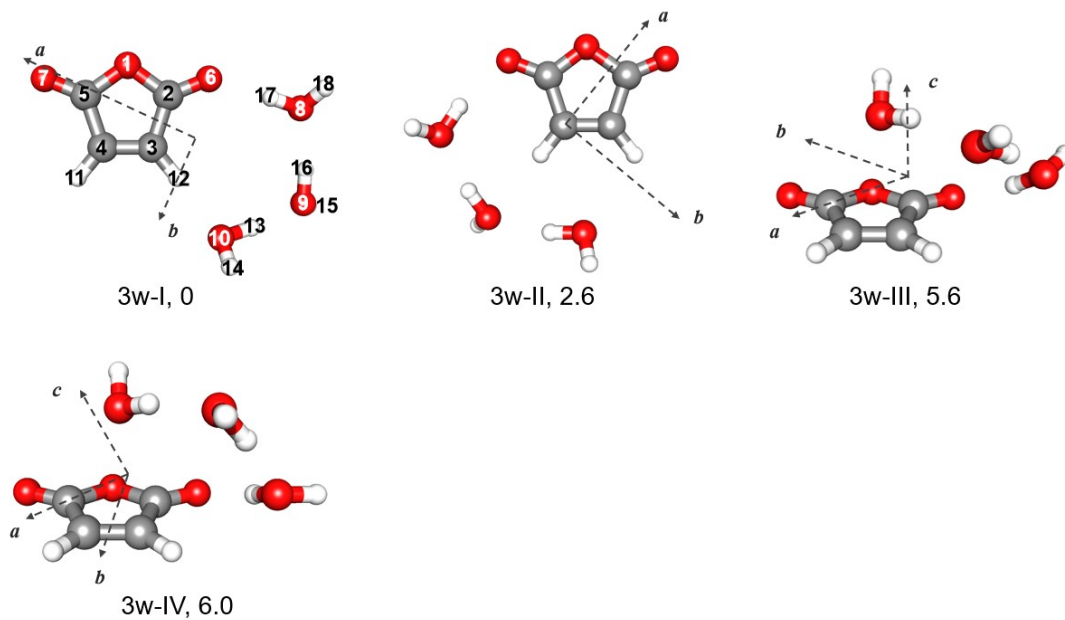

**Figure S4.** Results of the independent gradient model based on Hirshfeld partition (IGMH)<sup>[2]</sup> analysis of plausible isomers of the MAH-(H<sub>2</sub>O)<sub>1-3</sub> complexes. The  $\text{sign}(\lambda_2) \rho(r)$  function mapped on the  $\delta g_{\text{inter}}$  isosurface for all interactions ( $\delta g_{\text{inter}} = 0.005$  au and blue-red color scale  $-0.05 < \text{sign}(\lambda_2)\rho(r) < 0.05$ ) for the structures. Binding energies with BSSE corrections ( $B_{\text{BSSE}}$ , in unit of  $\text{kJ mol}^{-1}$ ) of MAH-(H<sub>2</sub>O)<sub>1-3</sub> calculated at the MP2/6-311++G(d,p) level within  $6.5 \text{ kJ mol}^{-1}$  are also given with the labeling shown in Figures S1-S3.

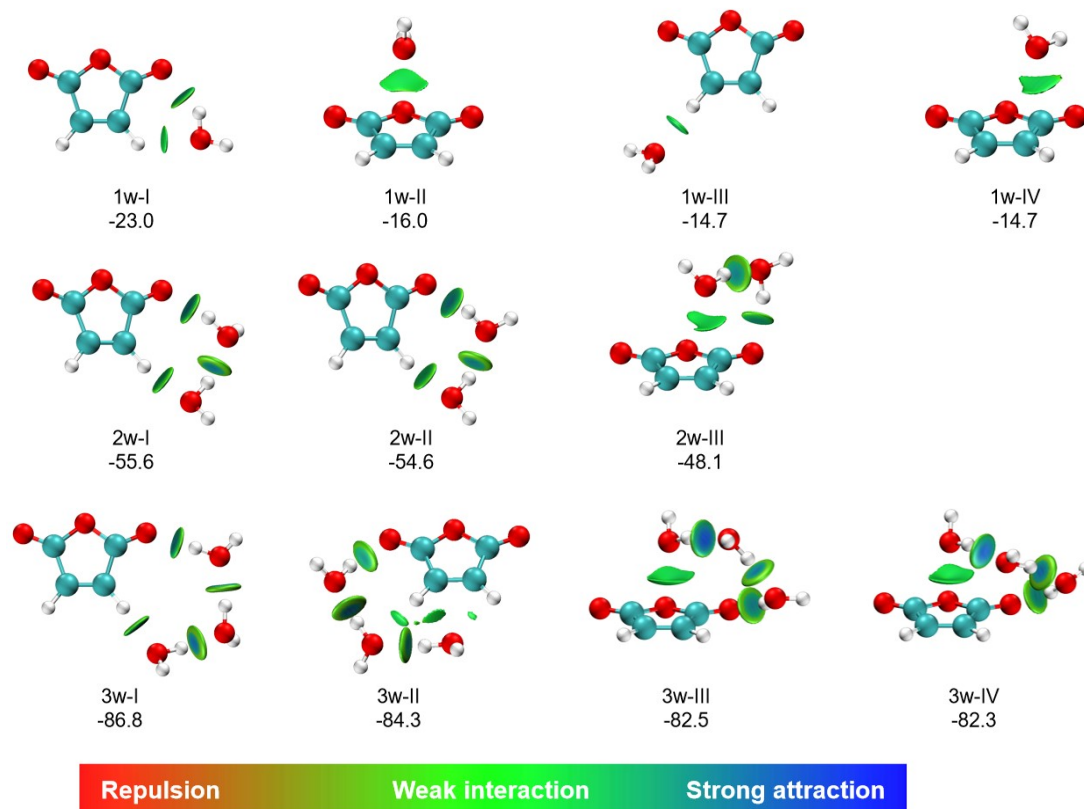

**Figure S5.** Comparison of the hydrogen bonding structures in MAH-(H<sub>2</sub>O)<sub>1-3</sub>, FMA-(H<sub>2</sub>O)<sub>1-3</sub>,<sup>[3]</sup> and (H<sub>2</sub>O)<sub>3-5</sub><sup>[4]</sup> calculated at the MP2/6-311++G(d,p) level. The dotted lines connect the heavy atoms forming a hydrogen bond loop in each hydrate.

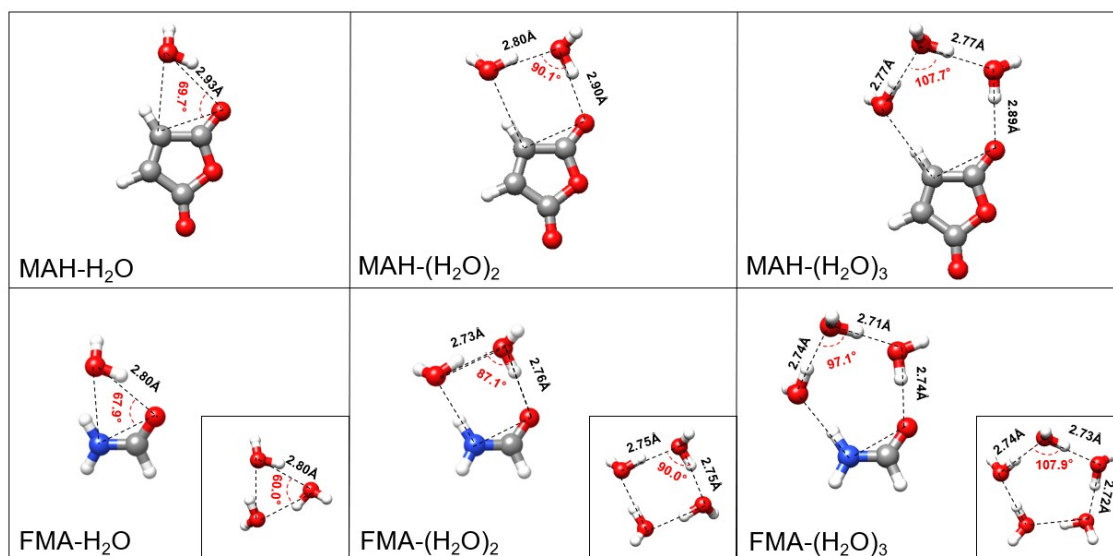

The highly structural similarity of MAH-(H<sub>2</sub>O)<sub>1-3</sub> to FMA-(H<sub>2</sub>O)<sub>1-3</sub> and (H<sub>2</sub>O)<sub>3-5</sub> indicates that MAH can act as a replacement for a (H<sub>2</sub>O)<sub>2</sub> moiety of a pure water cluster with little effect on the overall structure.



**Table S1.** Spectroscopic parameters of plausible isomers of MAH-H<sub>2</sub>O calculated at the MP2/6-311++G(d,p) level of theory within 6.5 kJ mol<sup>-1</sup>. The isomers have been labeled 1w-I, II, etc., shown in Figure S1.

| Parameters <sup>a</sup>         | 1w-I          | 1w-II         | 1w-III        | 1w-IV         |
|---------------------------------|---------------|---------------|---------------|---------------|
| A [MHz]                         | 5328.4        | 2593.8        | 3398.6        | 2812.9        |
| B [MHz]                         | 1106.7        | 1822.1        | 1048.4        | 1608.5        |
| C [MHz]                         | 917.1         | 1533.6        | 803.1         | 1461.8        |
| $ \mu_a ,  \mu_b ,  \mu_c $ [D] | 2.1, 2.5, 0.7 | 0.0, 0.8, 3.3 | 5.4, 2.5, 0.5 | 0.9, 1.1, 2.9 |

<sup>a</sup> A, B and C are the asymmetric top determinable rotational constants.  $\mu_a$ ,  $\mu_b$  and  $\mu_c$  are the electric dipole moment components (in Debye).

**Table S2.** Spectroscopic parameters of plausible isomers of MAH-(H<sub>2</sub>O)<sub>2</sub> calculated at the MP2/6-311++G(d,p) level of theory within 6.5 kJ mol<sup>-1</sup>. The isomers have been labeled 2w-I, II, etc., shown in Figure S2.

| Parameters <sup>a</sup>         | 2w-I          | 2w-II         | 2w-III        |
|---------------------------------|---------------|---------------|---------------|
| A [MHz]                         | 2929.9        | 2925.5        | 2207.8        |
| B [MHz]                         | 713.8         | 713.9         | 970.8         |
| C [MHz]                         | 575.0         | 575.1         | 911.6         |
| $ \mu_a ,  \mu_b ,  \mu_c $ [D] | 2.6, 1.1, 0.3 | 2.9, 0.9, 1.8 | 0.3, 1.9, 2.4 |

<sup>a</sup> A, B and C are the asymmetric top determinable rotational constants.  $\mu_a$ ,  $\mu_b$  and  $\mu_c$  are the electric dipole moment components (in Debye).

**Table S3.** Spectroscopic parameters of plausible isomers of MAH-(H<sub>2</sub>O)<sub>3</sub> calculated at the MP2/6-311++G(d,p) level of theory within 6.5 kJ mol<sup>-1</sup>. The isomers have been labeled 3w-I, II, etc., shown in Figure S3.

| Parameters <sup>a</sup>         | 3w-I          | 3w-II         | 3w-III        | 3w-IV         |
|---------------------------------|---------------|---------------|---------------|---------------|
| A [MHz]                         | 1816.6        | 1344.9        | 1813.9        | 1720.8        |
| B [MHz]                         | 485.7         | 681.0         | 724.1         | 736.5         |
| C [MHz]                         | 387.9         | 456.6         | 625.3         | 625.9         |
| $ \mu_a ,  \mu_b ,  \mu_c $ [D] | 2.4, 1.3, 0.6 | 4.2, 0.1, 0.8 | 4.2, 1.1, 1.7 | 4.2, 0.4, 3.1 |

<sup>a</sup> A, B and C are the asymmetric top determinable rotational constants.  $\mu_a$ ,  $\mu_b$  and  $\mu_c$  are the electric dipole moment components (in Debye).

**Table S4.** Experimental transition frequencies ( $\nu_{\text{obs}}$ /MHz) together with the corresponding observed – calculated differences ( $\nu_{\text{diff}}$ /MHz) for the observed isomer of MAH-H<sub>2</sub>O.

| Transitions    |                   | $\nu_{\text{obs}}$ /MHz | $\nu_{\text{diff}}$ /MHz | Transitions    |                   | $\nu_{\text{obs}}$ /MHz | $\nu_{\text{diff}}$ /MHz |
|----------------|-------------------|-------------------------|--------------------------|----------------|-------------------|-------------------------|--------------------------|
| $J' K_a' K_c'$ | $J'' K_a'' K_c''$ |                         |                          | $J' K_a' K_c'$ | $J'' K_a'' K_c''$ |                         |                          |
| 3 0 3          | 2 0 2             | 6026.0374               | -0.0001                  | 8 3 5          | 7 3 4             | 16219.6850              | 0.0000                   |
| 3 1 3          | 2 1 2             | 5766.5067               | 0.0002                   | 9 0 9          | 8 0 8             | 17526.6346              | -0.0004                  |
| 3 1 2          | 2 1 1             | 6325.7921               | 0.0000                   | 9 1 9          | 8 1 8             | 17163.5609              | -0.0008                  |
| 3 2 2          | 2 2 1             | 6049.8921               | 0.0013                   | 9 1 8          | 8 1 7             | 18787.6773              | 0.0015                   |
| 3 2 1          | 2 2 0             | 6073.7353               | 0.0023                   | 9 2 8          | 8 2 7             | 18042.3169              | -0.0002                  |
| 4 0 4          | 3 0 3             | 8007.1429               | 0.0000                   | 9 2 7          | 8 2 6             | 18663.2179              | 0.0011                   |
| 4 1 4          | 3 1 3             | 7681.9646               | -0.0003                  | 10 0 10        | 9 0 9             | 19358.9851              | -0.0016                  |
| 4 1 3          | 3 1 2             | 8427.1119               | -0.0003                  | 10 1 10        | 9 1 9             | 19037.9625              | -0.0013                  |
| 4 2 3          | 3 2 2             | 8061.8540               | 0.0005                   | 1 1 1          | 0 0 0             | 6289.4469               | 0.0022                   |
| 4 2 2          | 3 2 1             | 8121.1923               | 0.0007                   | 2 1 2          | 1 0 1             | 8119.6052               | 0.0004                   |
| 4 3 2          | 3 3 1             | 8078.1074               | 0.0020                   | 2 2 1          | 1 1 0             | 17038.0546              | -0.0013                  |
| 4 3 1          | 3 3 0             | 8078.8235               | 0.0013                   | 2 2 0          | 1 1 1             | 17230.4914              | -0.0064                  |
| 5 0 5          | 4 0 4             | 9965.4678               | 0.0002                   | 2 2 0          | 2 1 1             | 12824.2946              | 0.0013                   |
| 5 1 5          | 4 1 4             | 9592.0209               | 0.0001                   | 2 2 1          | 2 1 2             | 13377.7350              | 0.0013                   |
| 5 1 4          | 4 1 3             | 10521.8301              | -0.0003                  | 3 1 3          | 2 0 2             | 9858.8203               | -0.0001                  |
| 5 2 4          | 4 2 3             | 10069.8205              | 0.0002                   | 3 2 1          | 2 1 2             | 19457.4397              | 0.0022                   |
| 5 2 3          | 4 2 2             | 10187.4034              | 0.0007                   | 3 2 2          | 2 1 1             | 18868.2109              | -0.0022                  |
| 5 3 3          | 4 3 2             | 10102.4012              | 0.0000                   | 3 2 2          | 3 1 3             | 13661.1218              | 0.0038                   |
| 5 3 2          | 4 3 1             | 10104.9070              | 0.0003                   | 3 2 1          | 3 1 2             | 12572.2342              | 0.0000                   |
| 5 4 2          | 4 4 1             | 10096.4092              | 0.0064                   | 4 0 4          | 3 1 3             | 4174.3593               | -0.0006                  |
| 5 4 1          | 4 4 0             | 10096.4168              | -0.0018                  | 4 1 4          | 3 0 3             | 11514.7500              | 0.0022                   |
| 6 0 6          | 5 0 5             | 11897.1120              | 0.0001                   | 4 2 3          | 4 1 4             | 14041.0083              | 0.0018                   |
| 6 1 6          | 5 1 5             | 11495.7452              | 0.0004                   | 4 2 2          | 4 1 3             | 12266.3130              | -0.0004                  |
| 6 1 5          | 5 1 4             | 12607.8301              | -0.0065                  | 5 0 5          | 4 1 4             | 6457.8628               | 0.0002                   |
| 6 2 5          | 5 2 4             | 12072.8038              | -0.0002                  | 5 1 5          | 4 0 4             | 13099.6244              | -0.0012                  |
| 6 2 4          | 5 2 3             | 12275.2440              | -0.0004                  | 5 2 4          | 5 1 5             | 14518.8069              | 0.0009                   |
| 6 3 4          | 5 3 3             | 12129.2533              | 0.0011                   | 5 2 3          | 5 1 4             | 11931.8849              | -0.0008                  |
| 6 3 3          | 5 3 2             | 12135.9160              | 0.0000                   | 6 0 6          | 5 1 5             | 8762.9536               | -0.0001                  |
| 6 4 3          | 5 4 2             | 12119.9908              | 0.0044                   | 6 1 6          | 5 0 5             | 14629.9035              | 0.0005                   |
| 6 4 2          | 5 4 1             | 12120.0574              | -0.0003                  | 6 2 5          | 6 1 6             | 15095.8650              | -0.0003                  |
| 6 5 2          | 5 5 1             | 12114.6857              | -0.0020                  | 6 2 4          | 6 1 5             | 11599.2918              | -0.0017                  |
| 6 5 1          | 5 5 0             | 12114.6857              | -0.0023                  | 7 0 7          | 6 1 6             | 11067.4162              | -0.0006                  |
| 7 0 7          | 6 0 6             | 13800.2078              | 0.0000                   | 7 1 7          | 6 0 6             | 16125.2541              | 0.0005                   |
| 7 1 7          | 6 1 6             | 13392.4624              | 0.0000                   | 8 0 8          | 7 1 7             | 13350.5001              | -0.0001                  |
| 7 1 6          | 6 1 5             | 14682.7152              | -0.0003                  | 8 1 8          | 7 0 7             | 17606.8219              | 0.0012                   |
| 7 2 6          | 6 2 5             | 14069.8345              | -0.0003                  | 8 1 7          | 7 2 6             | 6166.4631               | -0.0008                  |
| 7 2 5          | 6 2 4             | 14385.5414              | 0.0008                   | 9 0 9          | 8 1 8             | 15595.3596              | -0.0007                  |

|       |       |            |         |         |         |            |         |
|-------|-------|------------|---------|---------|---------|------------|---------|
| 7 3 5 | 6 3 4 | 14158.5767 | -0.0003 | 9 1 9   | 8 0 8   | 19094.8361 | -0.0004 |
| 7 3 4 | 6 3 3 | 14173.5070 | -0.0004 | 9 1 8   | 8 2 7   | 8894.1692  | 0.0006  |
| 7 4 4 | 6 4 3 | 14145.8817 | 0.0002  | 10 0 10 | 9 1 9   | 17790.7851 | -0.0002 |
| 7 4 3 | 6 4 2 | 14146.1188 | -0.0003 | 11 0 11 | 10 1 10 | 19931.6718 | 0.0014  |
| 7 1 6 | 7 0 7 | 7521.0450  | 0.0005  | 11 1 10 | 11 0 11 | 12934.3409 | -0.0011 |
| 8 0 8 | 7 0 7 | 15675.5459 | 0.0000  | 11 1 10 | 10 2 9  | 14457.7466 | 0.0017  |
| 8 1 8 | 7 1 7 | 15281.7749 | -0.0001 | 5 3 3   | 6 2 4   | 9400.1958  | 0.0009  |
| 8 1 7 | 7 1 6 | 16743.7014 | -0.0014 | 5 3 2   | 6 2 5   | 9812.7023  | -0.0084 |
| 8 2 7 | 7 2 6 | 16059.9717 | 0.0005  | 4 3 2   | 5 2 3   | 11573.0421 | 0.0040  |
| 8 2 6 | 7 2 5 | 16516.4153 | -0.0012 | 4 3 1   | 5 2 4   | 11780.6123 | 0.0041  |
| 8 3 6 | 7 3 5 | 16190.0180 | -0.0015 |         |         |            |         |

**Table S5.** Experimental transition frequencies ( $\nu_{\text{obs}}$ /MHz) together with the corresponding observed – calculated differences ( $\nu_{\text{diff}}$ /MHz) for the observed isomer of MAH-(H<sub>2</sub>O)<sub>2</sub>.

| Transitions    |                   | $\nu_{\text{obs}}$ /MHz | $\nu_{\text{diff}}$ /MHz | Transitions    |                   | $\nu_{\text{obs}}$ /MHz | $\nu_{\text{diff}}$ /MHz |
|----------------|-------------------|-------------------------|--------------------------|----------------|-------------------|-------------------------|--------------------------|
| $J' K_a' K_c'$ | $J'' K_a'' K_c''$ |                         |                          | $J' K_a' K_c'$ | $J'' K_a'' K_c''$ |                         |                          |
| 4 0 4          | 3 0 3             | 5100.4966               | -0.0006                  | 9 2 8          | 8 2 7             | 11505.0418              | -0.0007                  |
| 4 1 4          | 3 1 3             | 4871.1526               | -0.0009                  | 9 2 7          | 8 2 6             | 12110.1753              | 0.0032                   |
| 4 1 3          | 3 1 2             | 5433.3884               | -0.0006                  | 10 0 10        | 9 0 9             | 12151.2115              | -0.0001                  |
| 4 2 3          | 3 2 2             | 5160.3176               | 0.0016                   | 10 1 10        | 9 1 9             | 12012.3035              | 0.0001                   |
| 4 2 2          | 3 2 1             | 5225.2682               | 0.0010                   | 11 0 11        | 10 0 10           | 13287.1497              | -0.0002                  |
| 4 3 2          | 3 3 1             | 5178.0201               | 0.0059                   | 11 1 11        | 10 1 10           | 13181.1371              | 0.0002                   |
| 4 3 1          | 3 3 0             | 5179.1708               | 0.0039                   | 12 0 12        | 11 0 11           | 14423.9778              | 0.0006                   |
| 5 0 5          | 4 0 4             | 6329.3253               | -0.0008                  | 12 1 12        | 11 1 11           | 14345.5436              | -0.0001                  |
| 5 1 5          | 4 1 4             | 6077.8446               | -0.0007                  | 13 0 13        | 12 0 12           | 15562.9653              | 0.0017                   |
| 5 1 4          | 4 1 3             | 6778.0484               | -0.0008                  | 13 1 13        | 12 1 12           | 15506.3407              | -0.0015                  |
| 5 2 4          | 4 2 3             | 6442.1597               | -0.0014                  | 3 1 3          | 2 0 2             | 5713.4022               | 0.0009                   |
| 5 2 3          | 4 2 2             | 6569.5970               | 0.0000                   | 3 2 1          | 2 1 2             | 10895.9859              | 0.0014                   |
| 5 3 3          | 4 3 2             | 6477.4144               | 0.0015                   | 3 2 2          | 2 1 1             | 10440.6294              | 0.0016                   |
| 5 3 2          | 4 3 1             | 6481.4342               | -0.0011                  | 3 3 1          | 2 2 0             | 15167.6590              | 0.0005                   |
| 6 0 6          | 5 0 5             | 7532.1632               | -0.0011                  | 3 3 0          | 2 2 1             | 15174.4330              | 0.0015                   |
| 6 1 6          | 5 1 5             | 7278.1127               | -0.0012                  | 2 2 1          | 1 1 0             | 9290.1242               | -0.0019                  |
| 6 1 5          | 5 1 4             | 8112.5017               | -0.0018                  | 2 2 0          | 1 1 1             | 9437.5556               | -0.0011                  |
| 6 2 5          | 5 2 4             | 7718.5495               | -0.0011                  | 2 2 0          | 2 1 1             | 6573.1164               | -0.0074                  |
| 6 2 4          | 5 2 3             | 7934.3514               | -0.0016                  | 3 2 1          | 3 1 2             | 6392.2808               | -0.0004                  |
| 6 3 4          | 5 3 3             | 7779.0989               | -0.0016                  | 3 2 2          | 3 1 3             | 7204.3778               | 0.0025                   |
| 6 3 3          | 5 3 2             | 7789.7674               | -0.0012                  | 4 1 4          | 3 0 3             | 6736.6844               | 0.0002                   |
| 6 4 3          | 5 4 2             | 7770.3488               | 0.0035                   | 4 2 3          | 4 1 4             | 7493.5363               | -0.0013                  |
| 6 4 2          | 5 4 1             | 7770.5120               | -0.0007                  | 4 2 2          | 4 1 3             | 6184.1597               | 0.0002                   |
| 6 5 2          | 5 5 1             | 7764.4251               | 0.0002                   | 4 3 2          | 3 2 1             | 16445.3573              | -0.0036                  |
| 6 5 1          | 5 5 0             | 7764.4327               | 0.0068                   | 5 0 5          | 4 1 4             | 4693.1473               | 0.0080                   |
| 7 0 7          | 6 0 6             | 8710.3142               | -0.0003                  | 5 1 5          | 4 0 4             | 7714.0329               | 0.0006                   |
| 7 1 7          | 6 1 6             | 8471.5627               | -0.0010                  | 5 2 4          | 5 1 5             | 7857.8544               | 0.0009                   |

|       |       |            |         |         |         |            |         |
|-------|-------|------------|---------|---------|---------|------------|---------|
| 7 1 6 | 6 1 5 | 9433.6577  | 0.0008  | 5 2 3   | 5 1 4   | 5975.7073  | 0.0000  |
| 7 2 6 | 6 2 5 | 8988.4527  | -0.0011 | 6 0 6   | 5 1 5   | 6147.4573  | -0.0009 |
| 7 2 5 | 6 2 4 | 9317.0370  | -0.0007 | 6 1 6   | 5 0 5   | 8662.8200  | 0.0000  |
| 7 3 5 | 6 3 4 | 9082.6439  | -0.0017 | 6 2 5   | 6 1 6   | 8298.2839  | -0.0063 |
| 7 3 4 | 6 3 3 | 9106.4299  | -0.0011 | 6 2 4   | 6 1 5   | 5797.5572  | 0.0005  |
| 7 4 4 | 6 4 3 | 9071.8735  | -0.0014 | 7 0 7   | 6 1 6   | 7579.6582  | -0.0006 |
| 7 4 3 | 6 4 2 | 9072.4309  | -0.0008 | 7 1 7   | 6 0 6   | 9602.2175  | -0.0018 |
| 7 5 3 | 6 5 2 | 9062.6319  | 0.0037  | 7 2 6   | 7 1 7   | 8815.1805  | 0.0000  |
| 7 5 2 | 6 5 1 | 9062.6319  | -0.0019 | 7 2 5   | 7 1 6   | 5680.9350  | -0.0026 |
| 8 0 8 | 7 0 7 | 9868.4756  | -0.0020 | 8 0 8   | 7 1 7   | 8976.5754  | 0.0026  |
| 8 1 8 | 7 1 7 | 9658.1674  | 0.0005  | 8 1 8   | 7 0 7   | 10550.0691 | -0.0025 |
| 8 1 7 | 7 1 6 | 10737.9495 | 0.0006  | 8 1 7   | 7 2 6   | 5826.5888  | -0.0035 |
| 8 2 7 | 7 2 6 | 10250.9066 | 0.0008  | 9 0 9   | 8 1 8   | 10331.6862 | 0.0001  |
| 8 2 6 | 7 2 5 | 10711.6646 | 0.0009  | 9 1 9   | 8 0 8   | 11519.8218 | 0.0022  |
| 8 3 6 | 7 3 5 | 10387.2481 | -0.0011 | 9 1 8   | 8 2 7   | 7597.1858  | 0.0001  |
| 8 3 5 | 7 3 4 | 10434.1445 | -0.0013 | 10 0 10 | 9 1 9   | 11644.6745 | 0.0023  |
| 8 4 5 | 7 4 4 | 10376.2152 | -0.0015 | 11 0 11 | 10 1 10 | 12919.5213 | 0.0025  |
| 8 4 4 | 7 4 3 | 10377.7398 | -0.0017 | 11 1 11 | 10 0 10 | 13548.7635 | -0.0045 |
| 9 0 9 | 8 0 8 | 11013.2815 | 0.0013  | 12 0 12 | 11 1 11 | 14162.3594 | 0.0003  |
| 9 1 9 | 8 1 8 | 10838.2260 | 0.0004  | 12 1 12 | 11 0 11 | 14607.1612 | -0.0006 |
| 9 1 8 | 8 1 7 | 12021.5007 | 0.0016  |         |         |            |         |

**Table S6.** Experimental transition frequencies ( $\nu_{\text{obs}}$ /MHz) together with the corresponding observed – calculated differences ( $\nu_{\text{diff}}$ /MHz) for the observed isomer of MAH-(H<sub>2</sub>O)<sub>3</sub>.

| Transitions    |                   | $\nu_{\text{obs}}$ /MHz | $\nu_{\text{diff}}$ /MHz | Transitions    |                   | $\nu_{\text{obs}}$ /MHz | $\nu_{\text{diff}}$ /MHz |
|----------------|-------------------|-------------------------|--------------------------|----------------|-------------------|-------------------------|--------------------------|
| $J' K_a' K_c'$ | $J'' K_a'' K_c''$ |                         |                          | $J' K_a' K_c'$ | $J'' K_a'' K_c''$ |                         |                          |
| 5 0 5          | 4 0 4             | 4269.2796               | -0.0094                  | 14 0 14        | 13 0 13           | 11248.4457              | 0.0021                   |
| 5 1 5          | 4 1 4             | 4103.4108               | -0.0014                  | 14 1 14        | 13 1 13           | 11229.7793              | -0.0008                  |
| 5 1 4          | 4 1 3             | 4589.2501               | -0.0025                  | 3 3 1          | 2 2 0             | 9528.2441               | 0.0006                   |
| 6 0 6          | 5 0 5             | 5075.1346               | -0.0007                  | 4 4 1          | 3 3 0             | 13178.3536              | -0.0002                  |
| 6 1 6          | 5 1 5             | 4912.2658               | -0.0024                  | 5 1 5          | 4 0 4             | 5058.1557               | -0.0011                  |
| 6 1 5          | 5 1 4             | 5489.9725               | 0.0020                   | 6 0 6          | 5 1 5             | 4286.2660               | -0.0015                  |
| 7 0 7          | 6 0 6             | 5863.8245               | 0.0040                   | 6 1 6          | 5 0 5             | 5701.1363               | 0.0002                   |
| 7 1 7          | 6 1 6             | 5716.0140               | -0.0008                  | 7 0 7          | 6 1 6             | 5237.8216               | 0.0018                   |
| 7 1 6          | 6 1 5             | 6379.7984               | -0.0006                  | 7 1 7          | 6 0 6             | 6342.0189               | 0.0033                   |
| 8 0 8          | 7 0 7             | 6639.8854               | 0.0025                   | 8 0 8          | 7 1 7             | 6161.6905               | 0.0026                   |
| 8 1 8          | 7 1 7             | 6514.7478               | 0.0000                   | 8 1 8          | 7 0 7             | 6992.9453               | 0.0025                   |
| 9 0 9          | 8 0 8             | 7408.6748               | 0.0019                   | 9 0 9          | 8 1 8             | 7055.6183               | 0.0052                   |
| 9 1 9          | 8 1 8             | 7308.8171               | 0.0004                   | 9 1 9          | 8 0 8             | 7661.8734               | -0.0030                  |
| 10 0 10        | 9 0 9             | 8174.6767               | -0.0015                  | 10 0 10        | 9 1 9             | 7921.4774               | 0.0027                   |
| 10 1 10        | 9 1 9             | 8098.7539               | 0.0006                   | 10 1 10        | 9 0 9             | 8351.9533               | -0.0035                  |
| 11 0 11        | 10 0 10           | 8940.7503               | -0.0012                  | 11 0 11        | 10 1 10           | 8763.4716               | -0.0014                  |

|         |         |            |         |         |         |            |         |
|---------|---------|------------|---------|---------|---------|------------|---------|
| 11 1 11 | 10 1 10 | 8885.1880  | -0.0004 | 11 1 11 | 10 0 10 | 9062.4667  | -0.0002 |
| 12 0 12 | 11 0 11 | 9708.2393  | -0.0032 | 12 0 12 | 11 1 11 | 9586.5245  | -0.0027 |
| 12 1 12 | 11 1 11 | 9668.7764  | 0.0016  | 12 1 12 | 11 0 11 | 9790.4915  | 0.0013  |
| 13 0 13 | 12 0 12 | 10477.5162 | -0.0006 | 13 0 13 | 12 1 12 | 10395.2642 | -0.0050 |
| 13 1 13 | 12 1 12 | 10450.1256 | -0.0007 | 13 1 13 | 12 0 12 | 10532.3804 | 0.0065  |

**Table S7.** Experimental transition frequencies ( $\nu_{\text{obs}}$ /MHz) together with the corresponding observed – calculated differences ( $\nu_{\text{diff}}$ /MHz) for the observed isotopologue of MAH-H<sub>2</sub><sup>18</sup>O.

| Transitions    |                   | $\nu_{\text{obs}}$ /MHz | $\nu_{\text{diff}}$ /MHz | Transitions    |                   | $\nu_{\text{obs}}$ /MHz | $\nu_{\text{diff}}$ /MHz |
|----------------|-------------------|-------------------------|--------------------------|----------------|-------------------|-------------------------|--------------------------|
| $J' K_a' K_c'$ | $J'' K_a'' K_c''$ |                         |                          | $J' K_a' K_c'$ | $J'' K_a'' K_c''$ |                         |                          |
| 3 0 3          | 2 0 2             | 5746.7855               | -0.0014                  | 7 1 7          | 6 1 6             | 12798.3015              | -0.0004                  |
| 3 1 3          | 2 1 2             | 5507.6622               | -0.0009                  | 7 1 6          | 6 1 5             | 13981.3587              | 0.0050                   |
| 3 1 2          | 2 1 1             | 6019.5176               | -0.0013                  | 1 1 1          | 0 0 0             | 6215.2272               | 0.0015                   |
| 4 0 4          | 3 0 3             | 7639.3044               | -0.0009                  | 2 1 2          | 1 0 1             | 7966.8150               | 0.0011                   |
| 4 1 4          | 3 1 3             | 7337.9217               | -0.0019                  | 2 2 1          | 1 1 0             | 16893.9720              | 0.0013                   |
| 4 1 3          | 3 1 2             | 8019.9632               | -0.0005                  | 2 2 0          | 1 1 1             | 17069.6114              | 0.0021                   |
| 4 2 3          | 3 2 2             | 7685.0539               | -0.0002                  | 3 1 3          | 2 0 2             | 9634.9856               | 0.0007                   |
| 4 2 2          | 3 2 1             | 7734.6649               | -0.0004                  | 3 2 1          | 2 1 2             | 19182.4092              | -0.0060                  |
| 5 0 5          | 4 0 4             | 9512.6407               | -0.0013                  | 3 2 2          | 2 1 1             | 18645.5560              | -0.0001                  |
| 5 1 5          | 4 1 4             | 9163.6260               | -0.0017                  | 4 1 4          | 3 0 3             | 11226.1227              | 0.0010                   |
| 5 1 4          | 4 1 3             | 10014.9372              | 0.0016                   | 5 0 5          | 4 1 4             | 5925.8229               | -0.0028                  |
| 5 2 4          | 4 2 3             | 9600.0479               | -0.0022                  | 5 1 5          | 4 0 4             | 12750.4466              | 0.0025                   |
| 5 2 3          | 4 2 2             | 9698.5073               | 0.0005                   | 6 0 6          | 5 1 5             | 8125.4707               | -0.0001                  |
| 6 0 6          | 5 0 5             | 11363.2706              | -0.0022                  | 6 1 6          | 5 0 5             | 14221.7622              | 0.0003                   |
| 6 1 6          | 5 1 5             | 10983.9580              | -0.0018                  | 7 0 7          | 6 1 6             | 10330.6689              | 0.0024                   |
| 6 1 5          | 5 1 4             | 12002.7183              | 0.0020                   | 7 1 7          | 6 0 6             | 15656.7911              | 0.0002                   |
| 7 0 7          | 6 0 6             | 13189.1562              | 0.0008                   |                |                   |                         |                          |

**Table S8.** Experimental transition frequencies ( $\nu_{\text{obs}}$ /MHz) together with the corresponding observed – calculated differences ( $\nu_{\text{diff}}$ /MHz) for the observed isotopologue of MAH-DOH.

| Transitions    |                   | $\nu_{\text{obs}}$ /MHz | $\nu_{\text{diff}}$ /MHz | Transitions    |                   | $\nu_{\text{obs}}$ /MHz | $\nu_{\text{diff}}$ /MHz |
|----------------|-------------------|-------------------------|--------------------------|----------------|-------------------|-------------------------|--------------------------|
| $J' K_a' K_c'$ | $J'' K_a'' K_c''$ |                         |                          | $J' K_a' K_c'$ | $J'' K_a'' K_c''$ |                         |                          |
| 3 0 3          | 2 0 2             | 5919.4985               | -0.0011                  | 7 1 7          | 6 1 6             | 12798.3015              | 0.0041                   |
| 3 1 3          | 2 1 2             | 5668.4697               | -0.0025                  | 7 1 6          | 6 1 5             | 13981.3587              | 0.0020                   |
| 3 1 2          | 2 1 1             | 6207.7519               | 0.0000                   | 1 1 1          | 0 0 0             | 6215.2272               | -0.0064                  |
| 4 0 4          | 3 0 3             | 7867.1245               | -0.0037                  | 2 1 2          | 1 0 1             | 7966.8150               | -0.0072                  |
| 4 1 4          | 3 1 3             | 7551.7420               | -0.0006                  | 2 2 1          | 1 1 0             | 16893.9720              | 0.0048                   |
| 4 1 3          | 3 1 2             | 8270.2744               | -0.0033                  | 2 2 0          | 1 1 1             | 17069.6114              | 0.0060                   |
| 4 2 3          | 3 2 2             | 7917.7800               | 0.0011                   | 3 1 3          | 2 0 2             | 9634.9856               | -0.0077                  |
| 4 2 2          | 3 2 1             | 7972.7125               | 0.0024                   | 3 2 1          | 2 1 2             | 19182.4092              | -0.0048                  |
| 5 0 5          | 4 0 4             | 9793.5949               | -0.0026                  | 3 2 2          | 2 1 1             | 18645.5560              | 0.0033                   |
| 5 1 5          | 4 1 4             | 9429.9931               | 0.0014                   | 4 1 4          | 3 0 3             | 11226.1227              | -0.0061                  |

|       |       |            |         |       |       |            |         |
|-------|-------|------------|---------|-------|-------|------------|---------|
| 5 1 4 | 4 1 3 | 10326.7133 | -0.0029 | 5 0 5 | 4 1 4 | 5925.8229  | 0.0004  |
| 5 2 4 | 4 2 3 | 9890.2822  | -0.0020 | 5 1 5 | 4 0 4 | 12750.4466 | -0.0022 |
| 5 2 3 | 4 2 2 | 9999.2132  | 0.0013  | 6 0 6 | 5 1 5 | 8125.4707  | 0.0013  |
| 6 0 6 | 5 0 5 | 11695.1586 | -0.0017 | 6 1 6 | 5 0 5 | 14221.7622 | 0.0005  |
| 6 1 6 | 5 1 5 | 11302.3419 | 0.0023  | 7 0 7 | 6 1 6 | 10330.6689 | 0.0016  |
| 6 1 5 | 5 1 4 | 12375.1371 | -0.0005 | 7 1 7 | 6 0 6 | 15656.7911 | 0.0043  |
| 7 0 7 | 6 0 6 | 13569.8418 | 0.0023  |       |       |            |         |

**Table S9.** Experimental transition frequencies ( $\nu_{\text{obs}}$ /MHz) together with the corresponding observed – calculated differences ( $\nu_{\text{diff}}$ /MHz) for the observed isotopologue of MAH-HOD.

| Transitions    |                   | $\nu_{\text{obs}}$ /MHz | $\nu_{\text{diff}}$ /MHz | Transitions    |                   | $\nu_{\text{obs}}$ /MHz | $\nu_{\text{diff}}$ /MHz |
|----------------|-------------------|-------------------------|--------------------------|----------------|-------------------|-------------------------|--------------------------|
| $J' K_a' K_c'$ | $J'' K_a'' K_c''$ |                         |                          | $J' K_a' K_c'$ | $J'' K_a'' K_c''$ |                         |                          |
| 3 0 3          | 2 0 2             | 5808.6479               | -0.0054                  | 7 1 7          | 6 1 6             | 12932.0932              | 0.0043                   |
| 3 1 3          | 2 1 2             | 5565.6832               | -0.0100                  | 7 1 6          | 6 1 5             | 14135.0429              | 0.0097                   |
| 3 1 2          | 2 1 1             | 6086.2904               | -0.0105                  | 1 1 1          | 0 0 0             | 6244.4451               | 0.0041                   |
| 4 0 4          | 3 0 3             | 7721.0548               | -0.0040                  | 2 1 2          | 1 0 1             | 8013.9462               | 0.0003                   |
| 4 1 4          | 3 1 3             | 7415.1136               | -0.0062                  | 2 2 1          | 1 1 0             | 16963.7028              | 0.0030                   |
| 4 1 3          | 3 1 2             | 8108.8028               | -0.0060                  | 2 2 0          | 1 1 1             | 17142.4198              | 0.0022                   |
| 4 2 3          | 3 2 2             | 7768.2765               | 0.0053                   | 3 1 3          | 2 0 2             | 9698.6357               | -0.0008                  |
| 4 2 2          | 3 2 1             | 7819.4725               | 0.0017                   | 3 2 1          | 2 1 2             | 19279.6135              | -0.0041                  |
| 5 0 5          | 4 0 4             | 9613.6884               | -0.0011                  | 3 2 2          | 2 1 1             | 18733.2002              | -0.0017                  |
| 5 1 5          | 4 1 4             | 9259.8484               | -0.0020                  | 4 1 4          | 3 0 3             | 11305.1016              | -0.0013                  |
| 5 1 4          | 4 1 3             | 10125.6614              | 0.0000                   | 5 0 5          | 4 1 4             | 6029.6404               | -0.0049                  |
| 5 2 4          | 4 2 3             | 9703.8617               | -0.0092                  | 5 1 5          | 4 0 4             | 12843.8940              | -0.0006                  |
| 5 2 3          | 4 2 2             | 9805.4484               | -0.0084                  | 6 0 6          | 5 1 5             | 8252.7448               | 0.0005                   |
| 6 0 6          | 5 0 5             | 11482.9514              | 0.0019                   | 6 1 6          | 5 0 5             | 14329.2558              | 0.0008                   |
| 6 1 6          | 5 1 5             | 11099.0509              | 0.0010                   | 7 0 7          | 6 1 6             | 10480.5085              | 0.0075                   |
| 6 1 5          | 5 1 4             | 12135.0822              | 0.0043                   | 7 1 7          | 6 0 6             | 15778.3956              | 0.0011                   |
| 7 0 7          | 6 0 6             | 13326.8131              | 0.0065                   |                |                   |                         |                          |

**Table S10.** Experimental transition frequencies ( $\nu_{\text{obs}}$ /MHz) together with the corresponding observed – calculated differences ( $\nu_{\text{diff}}$ /MHz) for the observed isotopologue of MAH-DOD.

| Transitions    |                   | $\nu_{\text{obs}}$ /MHz | $\nu_{\text{diff}}$ /MHz | Transitions    |                   | $\nu_{\text{obs}}$ /MHz | $\nu_{\text{diff}}$ /MHz |
|----------------|-------------------|-------------------------|--------------------------|----------------|-------------------|-------------------------|--------------------------|
| $J' K_a' K_c'$ | $J'' K_a'' K_c''$ |                         |                          | $J' K_a' K_c'$ | $J'' K_a'' K_c''$ |                         |                          |
| 3 0 3          | 2 0 2             | 5711.7705               | -0.0086                  | 7 1 7          | 6 1 6             | 12727.3062              | 0.0104                   |
| 3 1 3          | 2 1 2             | 5476.3665               | -0.0062                  | 7 1 6          | 6 1 5             | 13890.5545              | 0.0053                   |
| 3 1 2          | 2 1 1             | 5979.4429               | -0.0009                  | 1 1 1          | 0 0 0             | 6233.1410               | -0.0014                  |
| 4 0 4          | 3 0 3             | 7593.5409               | -0.0060                  | 2 1 2          | 1 0 1             | 7975.7191               | -0.0055                  |
| 4 1 4          | 3 1 3             | 7296.4187               | -0.0055                  | 2 2 1          | 1 1 0             | 16956.7340              | 0.0070                   |
| 4 1 3          | 3 1 2             | 7966.7750               | -0.0031                  | 2 2 0          | 1 1 1             | 17129.2360              | 0.0013                   |
| 4 2 3          | 3 2 2             | 7637.4670               | 0.0011                   | 3 1 3          | 2 0 2             | 11220.9182              | -0.0035                  |

|       |       |            |         |       |       |            |         |
|-------|-------|------------|---------|-------|-------|------------|---------|
| 4 2 2 | 3 2 1 | 7685.0953  | 0.0040  | 3 2 1 | 2 1 2 | 5829.5010  | 0.0055  |
| 5 0 5 | 4 0 4 | 9456.8681  | -0.0022 | 3 2 2 | 2 1 1 | 12739.4626 | -0.0046 |
| 5 1 5 | 4 1 4 | 9112.0920  | -0.0003 | 4 1 4 | 3 0 3 | 8015.7141  | 0.0042  |
| 5 1 4 | 4 1 3 | 9948.8596  | -0.0098 | 5 0 5 | 4 1 4 | 14205.1861 | 0.0043  |
| 5 2 4 | 4 2 3 | 9540.8043  | -0.0113 | 5 1 5 | 4 0 4 | 10208.9146 | 0.0053  |
| 5 2 3 | 4 2 2 | 9635.3540  | -0.0102 | 6 0 6 | 5 1 5 | 15634.1698 | -0.0009 |
| 6 0 6 | 5 0 5 | 11298.3077 | 0.0009  | 6 1 6 | 5 0 5 | 17129.2360 | 0.0013  |
| 6 1 6 | 5 1 5 | 10922.5893 | 0.0044  | 7 0 7 | 6 1 6 | 11220.9182 | -0.0035 |
| 6 1 5 | 5 1 4 | 11924.0757 | -0.0034 | 7 1 7 | 6 0 6 | 5829.5010  | 0.0055  |
| 7 0 7 | 6 0 6 | 13115.7926 | 0.0083  |       |       |            |         |

**Table S11.** Experimental transition frequencies ( $\nu_{\text{obs}}$ /MHz) together with the corresponding observed – calculated differences ( $\nu_{\text{diff}}$ /MHz) for the observed isotopologue of MAH-H<sub>2</sub><sup>18</sup>O8-H<sub>2</sub>O. (see Figure S2 for atom labeling)

| Transitions    |                   | $\nu_{\text{obs}}$ /MHz | $\nu_{\text{diff}}$ /kHz | Transitions    |                   | $\nu_{\text{obs}}$ /MHz | $\nu_{\text{diff}}$ /kHz |
|----------------|-------------------|-------------------------|--------------------------|----------------|-------------------|-------------------------|--------------------------|
| $J' K_a' K_c'$ | $J'' K_a'' K_c''$ |                         |                          | $J' K_a' K_c'$ | $J'' K_a'' K_c''$ |                         |                          |
| 5 0 5          | 4 0 4             | 6142.3249               | -0.0037                  | 7 1 6          | 6 1 5             | 9140.6650               | -0.0005                  |
| 5 1 5          | 4 1 4             | 5899.3360               | -0.0013                  | 8 0 8          | 7 0 7             | 9588.2762               | -0.0041                  |
| 5 1 4          | 4 1 3             | 6564.7867               | -0.0011                  | 8 1 8          | 7 1 7             | 9378.0325               | -0.0013                  |
| 5 2 4          | 4 2 3             | 6244.9419               | -0.0007                  | 9 0 9          | 8 0 8             | 10702.6496              | 0.0012                   |
| 5 2 3          | 4 2 2             | 6360.7993               | 0.0004                   | 9 1 9          | 8 1 8             | 10525.1121              | -0.0007                  |
| 6 0 6          | 5 0 5             | 7312.9774               | -0.0024                  | 10 0 10        | 9 0 9             | 11809.4933              | -0.0019                  |
| 6 1 6          | 5 1 5             | 7065.2219               | -0.0004                  | 10 1 10        | 9 1 9             | 11666.5216              | 0.0019                   |
| 6 1 5          | 5 1 4             | 7858.6908               | 0.0018                   | 11 0 11        | 10 0 10           | 12913.6306              | 0.0032                   |
| 6 2 5          | 5 2 4             | 7483.0089               | 0.0011                   | 11 1 11        | 10 1 10           | 12802.8976              | 0.0027                   |
| 6 2 4          | 5 2 3             | 7679.7255               | 0.0022                   | 3 1 3          | 2 0 2             | 5604.5175               | -0.0001                  |
| 7 0 7          | 6 0 6             | 8460.3407               | -0.0006                  | 4 1 4          | 3 0 3             | 6600.9146               | 0.0001                   |
| 7 1 7          | 6 1 6             | 8224.8119               | -0.0004                  | 5 1 5          | 4 0 4             | 7552.6232               | 0.0005                   |

**Table S12.** Experimental transition frequencies ( $\nu_{\text{obs}}$ /MHz) together with the corresponding observed – calculated differences ( $\nu_{\text{diff}}$ /MHz) for the observed isotopologue of MAH-H<sub>2</sub><sup>18</sup>O9-H<sub>2</sub>O. (see Figure S2 for atom labeling)

| Transitions    |                   | $\nu_{\text{obs}}$ /MHz | $\nu_{\text{diff}}$ /MHz | Transitions    |                   | $\nu_{\text{obs}}$ /MHz | $\nu_{\text{diff}}$ /MHz |
|----------------|-------------------|-------------------------|--------------------------|----------------|-------------------|-------------------------|--------------------------|
| $J' K_a' K_c'$ | $J'' K_a'' K_c''$ |                         |                          | $J' K_a' K_c'$ | $J'' K_a'' K_c''$ |                         |                          |
| 5 0 5          | 4 0 4             | 6166.4022               | 0.0001                   | 7 1 6          | 6 1 5             | 9197.0803               | 0.0072                   |
| 5 1 5          | 4 1 4             | 5920.9673               | -0.0045                  | 8 0 8          | 7 0 7             | 9609.5482               | -0.0021                  |
| 5 1 4          | 4 1 3             | 6609.3045               | 0.0000                   | 8 1 8          | 7 1 7             | 9407.3218               | -0.0032                  |
| 5 2 4          | 4 2 3             | 6279.3877               | -0.0064                  | 9 0 9          | 8 0 8             | 10723.4760              | 0.0020                   |
| 5 2 3          | 4 2 2             | 6407.0218               | -0.0043                  | 9 1 9          | 8 1 8             | 10556.1901              | -0.0005                  |
| 6 0 6          | 5 0 5             | 7336.8070               | -0.0019                  | 10 0 10        | 9 0 9             | 11831.0772              | 0.0000                   |
| 6 1 6          | 5 1 5             | 7089.8710               | -0.0045                  | 10 1 10        | 9 1 9             | 11699.1780              | 0.0027                   |
| 6 1 5          | 5 1 4             | 7909.8938               | 0.0034                   | 11 0 11        | 10 0 10           | 12937.0691              | 0.0043                   |
| 6 2 5          | 5 2 4             | 7523.1941               | -0.0043                  | 11 1 11        | 10 1 10           | 12837.0350              | 0.0062                   |
| 6 2 4          | 5 2 3             | 7739.0774               | 0.0001                   | 3 1 3          | 2 0 2             | 5541.7590               | 0.0030                   |

|       |       |           |         |       |       |           |         |
|-------|-------|-----------|---------|-------|-------|-----------|---------|
| 7 0 7 | 6 0 6 | 8482.8948 | -0.0003 | 4 1 4 | 3 0 3 | 6537.2501 | -0.0005 |
| 7 1 7 | 6 1 6 | 8251.9907 | -0.0043 | 5 1 5 | 4 0 4 | 7488.0500 | -0.0039 |

**Table S13.** Experimental transition frequencies ( $\nu_{\text{obs}}/\text{MHz}$ ) together with the corresponding observed – calculated differences ( $\nu_{\text{diff}}/\text{MHz}$ ) for the observed isotopologue of MAH-H<sub>2</sub><sup>18</sup>O8-H<sub>2</sub><sup>18</sup>O9. (see Figure S2 for atom labeling)

| Transitions    |                   | $\nu_{\text{obs}}/\text{MHz}$ | $\nu_{\text{diff}}/\text{MHz}$ | Transitions    |                   | $\nu_{\text{obs}}/\text{MHz}$ | $\nu_{\text{diff}}/\text{MHz}$ |
|----------------|-------------------|-------------------------------|--------------------------------|----------------|-------------------|-------------------------------|--------------------------------|
| $J' K_a' K_c'$ | $J'' K_a'' K_c''$ |                               |                                | $J' K_a' K_c'$ | $J'' K_a'' K_c''$ |                               |                                |
| 5 0 5          | 4 0 4             | 5993.0343                     | -0.0031                        | 7 1 6          | 6 1 5             | 8926.6273                     | 0.0053                         |
| 5 1 5          | 4 1 4             | 5755.2775                     | -0.0051                        | 8 0 8          | 7 0 7             | 9348.7806                     | -0.0011                        |
| 5 1 4          | 4 1 3             | 6412.6001                     | -0.0006                        | 8 1 8          | 7 1 7             | 9147.0398                     | -0.0030                        |
| 5 2 4          | 4 2 3             | 6097.0163                     | -0.0033                        | 9 0 9          | 8 0 8             | 10434.1081                    | -0.0010                        |
| 5 2 3          | 4 2 2             | 6214.4399                     | -0.0021                        | 9 1 9          | 8 1 8             | 10265.1612                    | 0.0002                         |
| 6 0 6          | 5 0 5             | 7133.3426                     | -0.0029                        | 10 0 10        | 9 0 9             | 11512.5756                    | 0.0028                         |
| 6 1 6          | 5 1 5             | 6892.2045                     | -0.0047                        | 10 1 10        | 9 1 9             | 11377.6704                    | 0.0027                         |
| 6 1 5          | 5 1 4             | 7675.7057                     | 0.0024                         | 11 0 11        | 10 0 10           | 12588.8349                    | 0.0058                         |
| 6 2 5          | 5 2 4             | 7305.3349                     | -0.0023                        | 11 1 11        | 10 1 10           | 12485.2339                    | 0.0046                         |
| 6 2 4          | 5 2 3             | 7504.4114                     | 0.0015                         | 3 1 3          | 2 0 2             | 5434.5833                     | 0.0017                         |
| 7 0 7          | 6 0 6             | 8250.5383                     | -0.0018                        | 4 1 4          | 3 0 3             | 6404.8225                     | 0.0001                         |
| 7 1 7          | 6 1 6             | 8022.8062                     | -0.0052                        | 5 1 5          | 4 0 4             | 7331.5040                     | -0.0028                        |



**Table S14.** Experimental values of spectroscopic parameters of the minor isotopologues of MAH-H<sub>2</sub>O. (see Figure S1 for atom labeling)

| Parameters <sup>a</sup>                  | MAH-H <sub>2</sub> <sup>18</sup> O | MAH-D12OH    | MAH-HOD11    | MAH-DOD      |
|------------------------------------------|------------------------------------|--------------|--------------|--------------|
| <i>A</i> [MHz]                           | 5339.4398(8) <sup>b</sup>          | 5377.3038(6) | 5359.6967(8) | 5361.859(1)  |
| <i>B</i> [MHz]                           | 1046.4474(2)                       | 1080.1635(1) | 1058.3245(2) | 1039.0143(2) |
| <i>C</i> [MHz]                           | 875.7954(1)                        | 900.3652(1)  | 884.7538(1)  | 871.2924(1)  |
| <i>D<sub>J</sub></i> [kHz]               | [-0.2022] <sup>c</sup>             | [-0.2022]    | [-0.2022]    | [-0.2022]    |
| <i>D<sub>JK</sub></i> [kHz]              | [0.411]                            | [0.411]      | [0.411]      | [0.411]      |
| <i>D<sub>K</sub></i> [kHz]               | [-9.80]                            | [-9.80]      | [-9.80]      | [-9.80]      |
| <i>d<sub>1</sub></i> [kHz]               | [-0.0418]                          | [-0.0418]    | [-0.0418]    | [-0.0418]    |
| <i>d<sub>2</sub></i> [kHz]               | [-0.0037]                          | [-0.0037]    | [-0.0037]    | [-0.0037]    |
| <i>N<sub>line</sub></i>                  | 33                                 | 33           | 33           | 33           |
| <i>P<sub>cc</sub></i> [uÅ <sup>2</sup> ] | 0.273(1)                           | 0.275(9)     | 0.305(6)     | 0.311(5)     |
| <i>σ</i> [kHz]                           | 2.8                                | 3.5          | 5.1          | 5.8          |

<sup>a</sup> *A*, *B* and *C* are the asymmetric top determinable rotational constants. *D<sub>J</sub>*, *D<sub>JK</sub>*, *D<sub>K</sub>*, *d<sub>1</sub>*, *d<sub>2</sub>* are centrifugal distortion constants. *N<sub>line</sub>* is the number of lines observed. *P<sub>cc</sub>* is the planar moments calculated from rotational constants through  $P_{cc} = h/(16\pi^2) (-1/C + 1/A + 1/B)$ . *σ* is the rms deviation of the fit. <sup>b</sup> Standard errors are given in parenthesis in units of the last digit. <sup>c</sup> Values in square brackets fixed to the parent species values. The *P<sub>cc</sub>* value of parent species is 0.272(5) uÅ<sup>2</sup>.

**Table S15.** Experimental values of spectroscopic parameters of the minor isotopologues of MAH-(H<sub>2</sub>O)<sub>2</sub>. (see Figure S2 for atom labeling)

| Parameters <sup>a</sup>                  | MAH-H <sub>2</sub> <sup>18</sup> O8-H <sub>2</sub> O | MAH-H <sub>2</sub> <sup>18</sup> O9-H <sub>2</sub> O | MAH-H <sub>2</sub> <sup>18</sup> O8-H <sub>2</sub> <sup>18</sup> O9 |
|------------------------------------------|------------------------------------------------------|------------------------------------------------------|---------------------------------------------------------------------|
| <i>A</i> [MHz]                           | 2874.461(3) <sup>b</sup>                             | 2807.627(3)                                          | 2773.559(3)                                                         |
| <i>B</i> [MHz]                           | 692.7219(3)                                          | 698.6590(3)                                          | 677.1513(3)                                                         |
| <i>C</i> [MHz]                           | 558.9306(1)                                          | 560.1649(1)                                          | 544.9566(1)                                                         |
| <i>D<sub>J</sub></i> [kHz]               | [0.083] <sup>c</sup>                                 | [0.083]                                              | [0.083]                                                             |
| <i>D<sub>JK</sub></i> [kHz]              | [0.627]                                              | [0.627]                                              | [0.627]                                                             |
| <i>D<sub>K</sub></i> [kHz]               | [5.23]                                               | [5.23]                                               | [5.23]                                                              |
| <i>d<sub>1</sub></i> [kHz]               | [-0.0245]                                            | [-0.0245]                                            | [-0.0245]                                                           |
| <i>d<sub>2</sub></i> [kHz]               | [-0.0059]                                            | [-0.0059]                                            | [-0.0059]                                                           |
| <i>N<sub>line</sub></i>                  | 24                                                   | 24                                                   | 24                                                                  |
| <i>P<sub>cc</sub></i> [uÅ <sup>2</sup> ] | 0.591(6)                                             | 0.580(5)                                             | 0.584(7)                                                            |
| <i>σ</i> [kHz]                           | 1.8                                                  | 3.6                                                  | 3.2                                                                 |

<sup>a</sup> *A*, *B* and *C* are the asymmetric top determinable rotational constants. *D<sub>J</sub>*, *D<sub>JK</sub>*, *D<sub>K</sub>*, *d<sub>1</sub>*, *d<sub>2</sub>* are centrifugal distortion constants. *N<sub>line</sub>* is the number of lines observed. *P<sub>cc</sub>* is the planar moments calculated from rotational constants through  $P_{cc} = h/(16\pi^2) (-1/C + 1/A + 1/B)$ . *σ* is the rms deviation of the fit. <sup>b</sup> Standard errors are given in parenthesis in units of the last digit. <sup>c</sup> Values in square brackets fixed to the parent species values. The *P<sub>cc</sub>* value of parent species is 0.587(2) uÅ<sup>2</sup>.

**Table S16.** Comparison between  $r_s$  and  $r_e$  coordinates of the MAH-(H<sub>2</sub>O)<sub>1-2</sub> complexes. (see Figures S1-S2 for atom labeling)

| species                             |     | a /Å    |                         | b /Å   |           | c /Å   |                  |
|-------------------------------------|-----|---------|-------------------------|--------|-----------|--------|------------------|
|                                     |     | $r_e^a$ | $r_s$                   | $r_e$  | $r_s$     | $r_e$  | $r_s$            |
| MAH-H <sub>2</sub> O                | O8  | -3.486  | -3.4988(4) <sup>b</sup> | 0.587  | 0.577(3)  | -0.067 | -0.02(9)         |
|                                     | H11 | -4.385  | -4.3288(4)              | 0.489  | 0.486(3)  | 0.254  | 0.186(8)         |
| MAH-(H <sub>2</sub> O) <sub>2</sub> | O8  | -3.457  | -3.4672(4) <sup>b</sup> | -0.956 | -0.988(2) | 0.014  | 0.05(3)          |
|                                     | O9  | -2.919  | -2.9713(5)              | 1.755  | 1.7776(8) | -0.035 | [0] <sup>c</sup> |

<sup>a</sup> The  $r_e$  coordinates were calculated at MP2/6-311++G(d,p) level of theory. <sup>b</sup> Errors in parentheses are 1 $\sigma$  uncertainties expressed in units of the last digit. <sup>c</sup> Slightly imaginary value: fixed at zero.

**Table S17.** Comparison between  $r_s$  and  $r_e$  structural parameters of the MAH-(H<sub>2</sub>O)<sub>1-2</sub> complexes. (see Figures S1-S2 for atom labeling)

| species                             | parameters           | $r_e^a$ | $r_s$                 |
|-------------------------------------|----------------------|---------|-----------------------|
| MAH-H <sub>2</sub> O                | $r_{O8H11}/\text{Å}$ | 0.959   | 0.86(2) <sup>b</sup>  |
| MAH-(H <sub>2</sub> O) <sub>2</sub> | $r_{O8O9}/\text{Å}$  | 2.796   | 2.809(2) <sup>b</sup> |

<sup>a</sup> The  $r_e$  structural parameter was calculated at MP2/6-311++G(d,p) level of theory. <sup>b</sup> Errors in parentheses are 1 $\sigma$  uncertainties expressed in units of the last digit.

**Table S18.** MP2/6-311++G(d,p) geometry of the observed isomer of MAH-H<sub>2</sub>O.

| Bond lengths (Å) |      | Valence angles (°) |       | Dihedral angles (°) |        |
|------------------|------|--------------------|-------|---------------------|--------|
| O1C5             | 1.40 |                    |       |                     |        |
| C5C4             | 1.48 | O1C5C4             | 107.7 |                     |        |
| C4C3             | 1.34 | C5C4C3             | 108.2 | O1C5C4C3            | 0.0    |
| C3C2             | 1.49 | C4C3C2             | 107.4 | C5C4C3C2            | -0.0   |
| C5O7             | 1.20 | C4C5O7             | 130.0 | O7C5C4C3            | -179.9 |
| C2O6             | 1.20 | C3C2O6             | 129.2 | C4C3C2O6            | 178.0  |
| O6O8             | 2.93 | C2O6O8             | 98.0  | C3C2O6O8            | 3.4    |
| C3H10            | 1.08 | C4C3H10            | 131.0 | C5C4C3H10           | -178.0 |
| C4H9             | 1.08 | C5C4H9             | 122.1 | O7C5C4H9            | 0.1    |
| O8H11            | 0.96 | O6O8H11            | 128.5 | C2O6O8H11           | -153.6 |
| O8H12            | 0.96 | O6O8H12            | 25.7  | C2O6O8H12           | -177.4 |

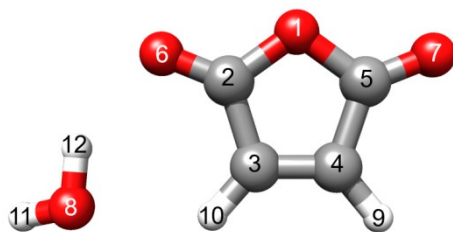

**Table S19.** MP2/6-311++G(d,p) geometry of the observed isomer of MAH-(H<sub>2</sub>O)<sub>2</sub>.

| Bond lengths (Å) |      | Valence angles (°) |       | Dihedral angles (°) |        |
|------------------|------|--------------------|-------|---------------------|--------|
| O1C2             | 1.38 |                    |       |                     |        |
| C2C3             | 1.49 | O1C2C3             | 108.9 |                     |        |
| C3C4             | 1.34 | C2C3C4             | 107.1 | O1C2C3C4            | 0.2    |
| C4C5             | 1.49 | C3C4C5             | 108.4 | C2C3C4C5            | -0.2   |
| C2O6             | 1.20 | C3C2O6             | 129.4 | C4C3C2O6            | -179.7 |
| C5O7             | 1.20 | C4C5O7             | 130.4 | C3C4C5O7            | -179.9 |
| O6O8             | 2.90 | C2O6O8             | 124.0 | C3C2O6O8            | 1.2    |
| O8O9             | 2.80 | O6O8O9             | 90.1  | C2O6O8O9            | 0.0    |
| C4H10            | 1.08 | C3C4H10            | 129.4 | C2O3C4H10           | 179.9  |
| C3H11            | 1.09 | C2C3H11            | 122.6 | C6C2C3H11           | 0.1    |
| O8H12            | 0.96 | O6O8H12            | 110.9 | C2O6O8H12           | 135.2  |
| O8H13            | 0.97 | O6O8H13            | 9.7   | C2O6O8H13           | -174.2 |
| O9H14            | 0.96 | O8O9H14            | 112.4 | O6O8O9H14           | -140.8 |
| O8H15            | 0.97 | O8O9H15            | 11.4  | O6O8O9H15           | 172.9  |

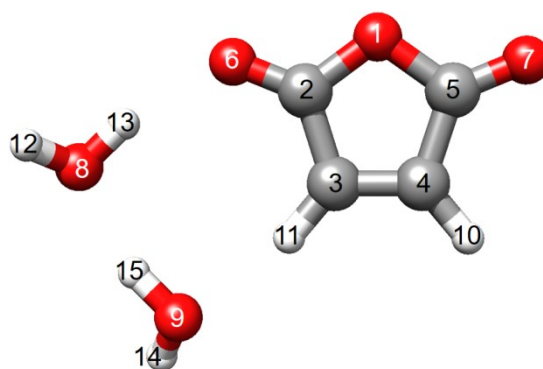

**Table S20.** MP2/6-311++G(d,p) geometry of the observed isomer of MAH-(H<sub>2</sub>O)<sub>3</sub>.

| Bond lengths (Å) |      | Valence angles (°) |       | Dihedral angles (°) |        |
|------------------|------|--------------------|-------|---------------------|--------|
| O1C2             | 1.38 |                    |       |                     |        |
| C2C3             | 1.49 | O1C2C3             | 109.0 |                     |        |
| C3C4             | 1.34 | C2C3C4             | 107.0 | O1C2C3C4            | 0.3    |
| C4C5             | 1.49 | C3C4C5             | 108.5 | C2C3C4C5            | -0.2   |
| C2O6             | 1.20 | C3C2O6             | 129.4 | C4C3C2O6            | -179.8 |
| C5O7             | 1.20 | C4C5O7             | 130.5 | C3C4C5O7            | -179.8 |
| O6O8             | 2.89 | C2O6O8             | 139.4 | C3C2O6O8            | 20.2   |
| O8O9             | 2.77 | O6O8O9             | 110.3 | C2O6O8O9            | -15.1  |
| O9O10            | 2.77 | O8O9O10            | 103.0 | O6O8O9O10           | -8.1   |
| C4H11            | 1.08 | C3C4H11            | 129.3 | C2C3C4H11           | 178.0  |
| C3O12            | 1.09 | C2C3H12            | 123.4 | O6C2C3H12           | 0.6    |
| O10H13           | 0.97 | O9O10H13           | 4.6   | O8O9O10H13          | 169.4  |
| O10H14           | 0.96 | O9O10H14           | 106.0 | O8O9O10H14          | -127.8 |
| O9H15            | 0.95 | O8O9H15            | 106.3 | O6O8O9H15           | 124.1  |
| O9H16            | 0.97 | O8O9H16            | 5.0   | O6O8O9H16           | -166.1 |
| O8H17            | 0.97 | O6O8H17            | 1.2   | C2O6O8H17           | 159.2  |
| O8H18            | 0.96 | O6O8H18            | 105.2 | C2O6O8H18           | -154.7 |

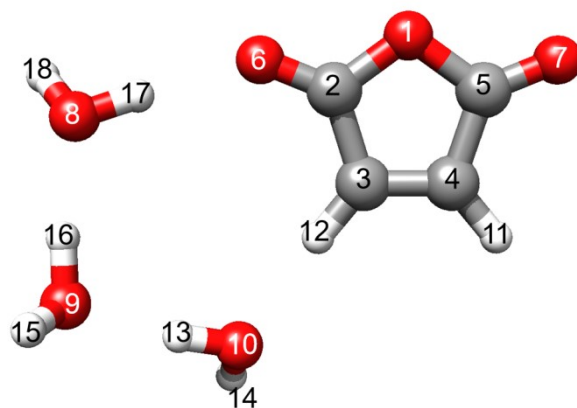

## References

- [1] Gaussian 16, Revision A.03, M. J. Frisch, G. W. Trucks, H. B. Schlegel, G. E. Scuseria, M. A. Robb, J. R. Cheeseman, G. Scalmani, V. Barone, G. A. Petersson, H. Nakatsuji, X. Li, M. Caricato, A. V. Marenich, J. Bloino, B. G. Janesko, R. Gomperts, B. Mennucci, H. P. Hratchian, J. V. Ortiz, A. F. Izmaylov, J. L. Sonnenberg, D. Williams-Young, F. Ding, F. Lipparini, F. Egidi, J. Goings, B. Peng, A. Petrone, T. Henderson, D. Ranasinghe, V. G. Zakrzewski, J. Gao, N. Rega, G. Zheng, W. Liang, M. Hada, M. Ehara, K. Toyota, R. Fukuda, J. Hasegawa, M. Ishida, T. Nakajima, Y. Honda, O. Kitao, H. Nakai, T. Vreven, K. Throssell, J. A. Montgomery, Jr., J. E. Peralta, F. Ogliaro, M. J. Bearpark, J. J. Heyd, E. N. Brothers, K. N. Kudin, V. N. Staroverov, T. A. Keith, R. Kobayashi, J. Normand, K. Raghavachari, A. P. Rendell, J. C. Burant, S. S. Iyengar, J. Tomasi, M. Cossi, J. M. Millam, M. Klene, C. Adamo, R. Cammi, J. W. Ochterski, R. L. Martin, K. Morokuma, O. Farkas, B. Foresman, and D. J. Fox, Gaussian, Inc., Wallingford CT, 2016.
- [2] T. Lu, Q. Chen. *J. Comput. Chem.*, 2022, **43**, 539-555.
- [3] S. Blanco, J. C. López, A. Lesarri, J. L. Alonso. *J. Am. Chem. Soc.*, 2006, **128 (37)**, 12111-12121; S. Blanco, P. Pinacho, J. C. López. *J. Phys. Chem. Lett.*, 2017, **8 (24)**, 6060-6066.
- [4] F. N. Keutsch, J. D. Cruzan, R. J. Saykally, *Chem. Rev.*, 2003, **103**, 2533–2577; J. D. Cruzan, L. B. Braly, K. Liu, M. G. Brown, J. G. Loeser, R. J. Saykally. *Science*, 1996, **271**, 59–62; K. Liu, M. G. Brown, J. D. Cruzan, R. J. Saykally. *Science*, 1996, **271**, 62–64.
